# Supplementary material for: Two-Year Follow-Up clinical Study of Mini WELL Extended Depth-of-Focus Intraocular Lens Implantation: Performance and Safety Evaluation
Source: Research Square preprint supplement (doi:10.21203/rs.3.rs-4723302/v1), 2024-08-17
Supplement: Supplementary file 1 [file 504e8ed9718ad47382bfbffd.docx]

**Supplementary Methods**

**Supplementary Methods 1.**Visual disturbances and distortions detection.

A specific software (Halo v1.0 software, Laboratory of Vision Sciences and Applications, University of Granada, Spain) was used by Investigator to test the presence of visual disturbances under low illumination. The test consists of discriminating peripheral luminous stimuli of 2 pixels around a more luminous central target of 24 pixels. The central stimulus causes intraocular scattering and retinal reflection in the patient’s eye, depending on the state of the retina and ocular media. The discrimination capacity of peripheral stimuli in the presence of visual disturbances is assessed by the disturbance index. The index is calculated as a ratio between non detected stimuli and all the peripheral stimuli presented to the observer. A free available program (downloaded for free from <http://www.ugr.es/~labvisgr/>) was used to evaluate the halos.
